# Supplementary material for: Hybrid density functional theory/molecular mechanics calculations of two-photon absorption of dimethylamino nitro stilbene in solution
Source: Royal Society of Chemistry journal article supplement (doi:10.1039/c1cp20611g), 2011-01-01
Supplement: c1cp20611g.pdf [file c1cp20611g.pdf]

# Supplementary Information

## Hybrid density functional theory / molecular mechanics calculations of two-photon absorption of dimethylamino nitro stilbene in solution

N. Arul Murugan<sup>†</sup>, Jacob Kongsted<sup>‡</sup>, Zilvinas Rinkevicius<sup>†</sup>, Kęstutis Aidas<sup>†</sup>,  
Kurt V. Mikkelsen<sup>§</sup> and Hans Ågren<sup>†</sup>

<sup>†</sup>Department of Theoretical Chemistry and Biology  
School of Biotechnology  
Royal Institute of Technology  
SE-10691 Stockholm, Sweden

<sup>‡</sup>Department of Physics and Chemistry  
University of Southern Denmark  
Campusvej 55  
DK-5230 Odense M, Denmark

<sup>§</sup>Department of Chemistry  
H. C. Ørsted Institute, University of Copenhagen  
Universitetsparken 5  
DK-2100 Copenhagen Ø, Denmark

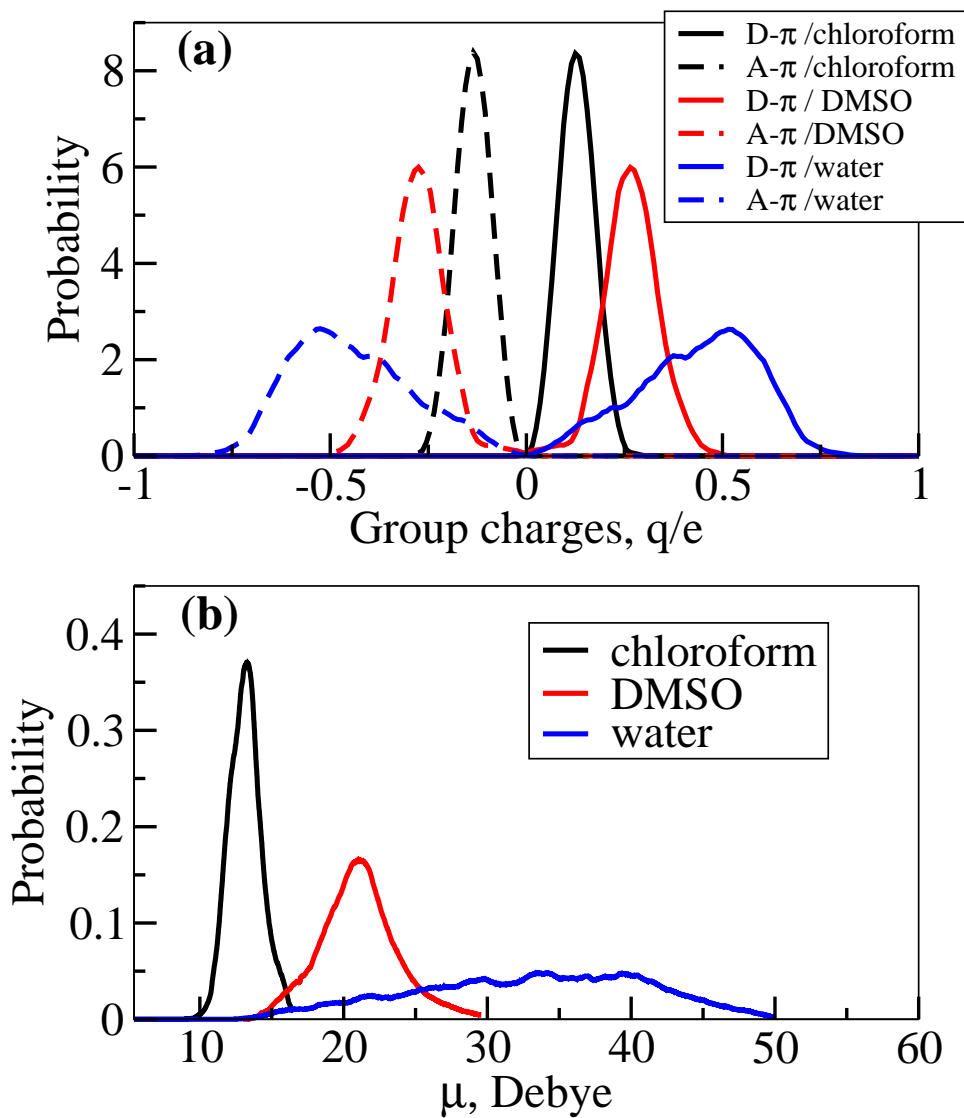

Figure 1s (a) Group charge distribution for DANS in chloroform, DMSO and in water (b) Molecular dipole moment for DANS in chloroform, DMSO and in water solvents.

Table 1s. Standard deviation in the excitation energy corresponding to different models.

| Method  | DANS in CHCl <sub>3</sub> | DANS in DMSO | DANS in water |
|---------|---------------------------|--------------|---------------|
| QM/MM-0 | 0.08                      | 0.10         | 0.13          |
| QM/PCM  | 0.11                      | 0.14         | 0.16          |
| QM/MM-1 | 0.13                      | 0.24         | 0.21          |
| QM/MM-2 | 0.14                      | 0.24         | 0.26          |
| QM/MM-3 | —                         | —            | 0.21          |
